# Supplementary material for: Mechanistic insights into high-throughput screening of tandem catalysts for CO2 reduction to multi-carbon products
Source: Royal Society of Chemistry journal article supplement (doi:10.1039/d4cp01622j), 2024-01-01
Supplement: d4cp01622j1.pdf [file d4cp01622j1.pdf]

## Supporting Information

### **Mechanistic insights into high-throughput screening of tandem catalysts for CO<sub>2</sub> reduction to multi-carbon products**

Yingnan Liu,<sup>a</sup> Dashuai Wang,<sup>\*ab</sup> Bin Yang,<sup>a</sup> Zhongjian Li,<sup>a</sup> Tao Zhang,<sup>f</sup> Raul D.  
Rodriguez,<sup>e</sup> Lecheng Lei<sup>ab</sup> and Yang Hou<sup>\*abcd</sup>

<sup>a</sup> Key Laboratory of Biomass Chemical Engineering of Ministry of Education,  
College of Chemical and Biological Engineering, Zhejiang University, Hangzhou  
310027, China

<sup>b</sup> Institute of Zhejiang University - Quzhou, Quzhou 324000, China

<sup>c</sup> School of Biological and Chemical Engineering, NingboTech University, Ningbo  
315100, China

<sup>d</sup> Hydrogen Energy Institute, Zhejiang University, Hangzhou 310027, China

<sup>e</sup> Tomsk Polytechnic University, 30 Lenin Ave, Tomsk 634050, Russia

<sup>f</sup> Ningbo Institute of Materials Technology & Engineering, University of Chinese  
Academy of Sciences, Ningbo 315200, China

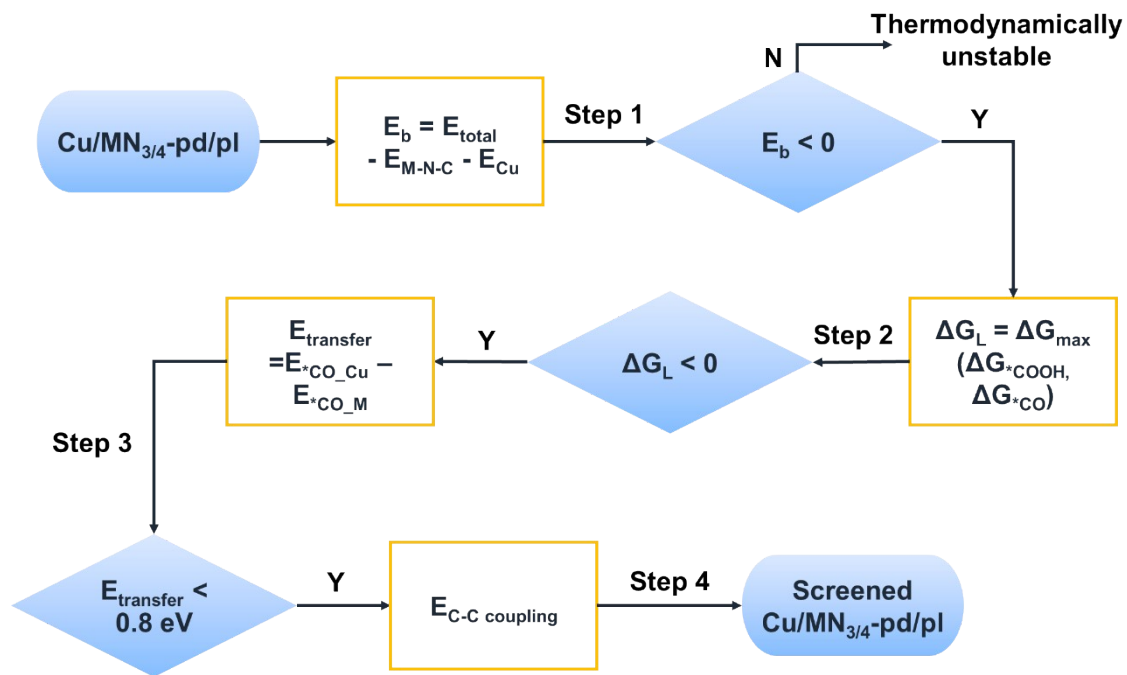

**Fig. S1 Schematic diagram of the screening process for selecting optimal tandem catalysts**

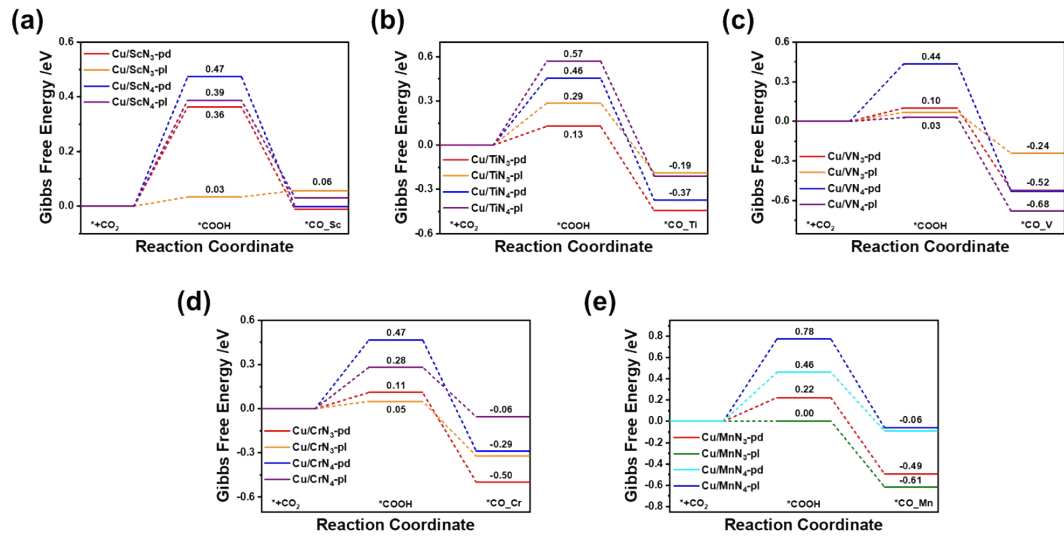

Fig. S2 Gibbs free energy step diagram of reducing CO<sub>2</sub> to \*CO on (a) Cu/ScN<sub>3/4</sub>-pd/pl, (b) Cu/TiN<sub>3/4</sub>-pd/pl, (c) Cu/VN<sub>3/4</sub>-pd/pl, (d) Cu/CrN<sub>3/4</sub>-pd/pl, (e) Cu/MnN<sub>3/4</sub>-pd/pl.

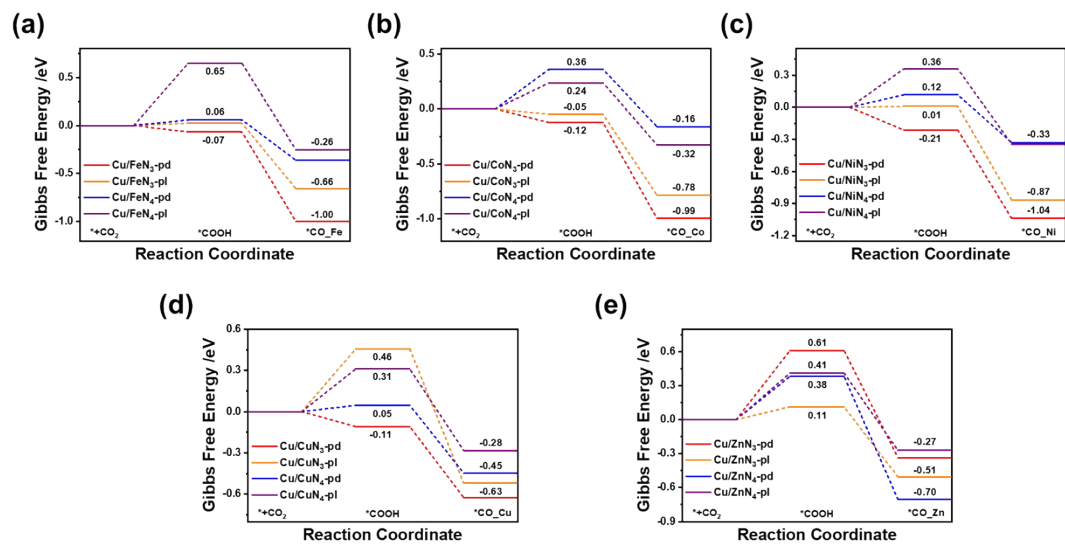

**Fig. S3** Gibbs free energy step diagram of reducing  $\text{CO}_2$  to  $^*\text{CO}$  on (a) Cu/FeN<sub>3/4</sub>-pd/pl, (b) Cu/CoN<sub>3/4</sub>-pd/pl, (c) Cu/NiN<sub>3/4</sub>-pd/pl, (d) Cu/CuN<sub>3/4</sub>-pd/pl, (e) Cu/ZnN<sub>3/4</sub>-pd/pl.



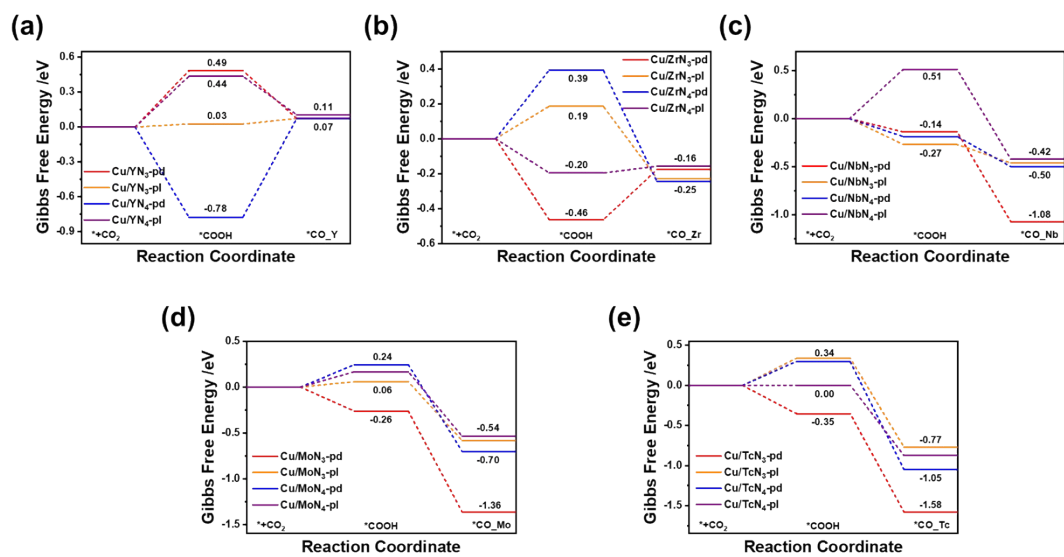

**Fig. S4** Gibbs free energy step diagram of reducing  $\text{CO}_2$  to  $^*\text{CO}$  on (a) Cu/YN<sub>3/4</sub>-pd/pl, (b) Cu/ZrN<sub>3/4</sub>-pd/pl, (c) Cu/NbN<sub>3/4</sub>-pd/pl, (d) Cu/MoN<sub>3/4</sub>-pd/pl, (e) Cu/TcN<sub>3/4</sub>-pd/pl.

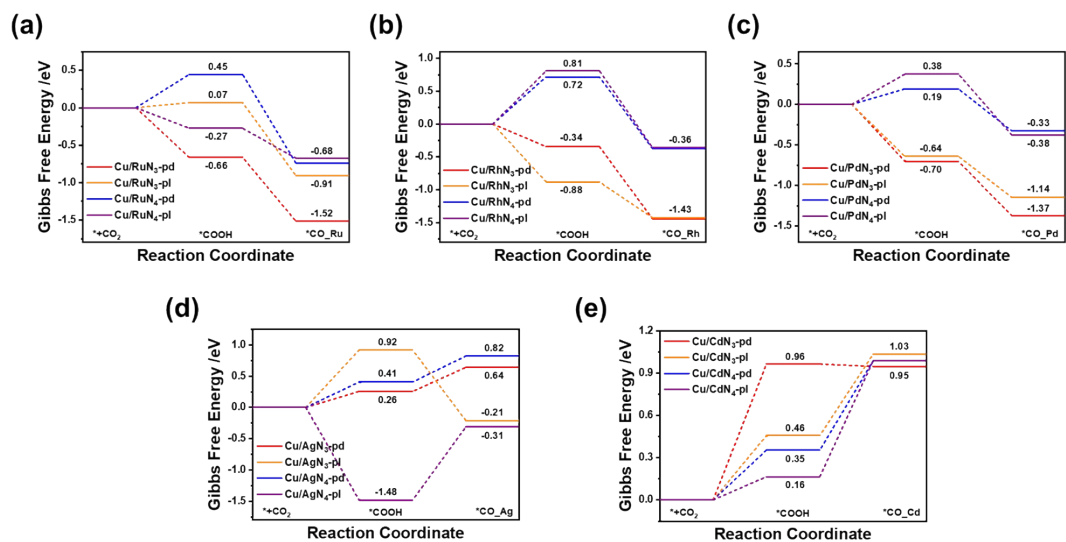

**Fig. S5** Gibbs free energy step diagram of reducing  $\text{CO}_2$  to  $^*\text{CO}$  on (a) Cu/RuN<sub>3/4</sub>-pd/pl, (b) Cu/RhN<sub>3/4</sub>-pd/pl, (c) Cu/PdN<sub>3/4</sub>-pd/pl, (d) Cu/AgN<sub>3/4</sub>-pd/pl, (e) Cu/CdN<sub>3/4</sub>-pd/pl.

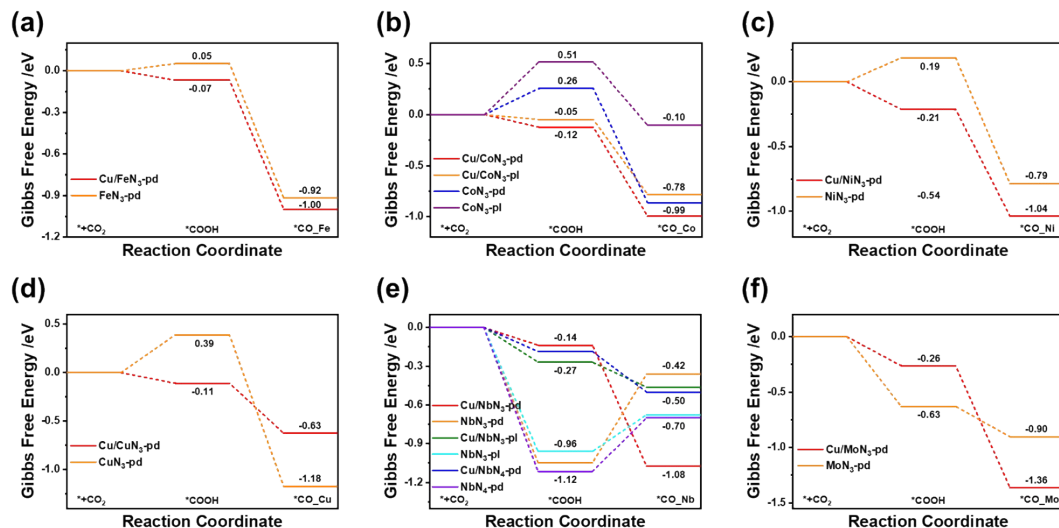

**Fig. S6** Gibbs free energy step diagram of reducing  $\text{CO}_2$  to  $^*\text{CO}$  on (a) Cu/FeN<sub>3</sub>-pd and FeN<sub>3</sub>-pd, (b) Cu/CoN<sub>3</sub>-pd/pl and CoN<sub>3</sub>-pd/pl, (c) Cu/NiN<sub>3</sub>-pd and NiN<sub>3</sub>-pd, (d) Cu/CuN<sub>3</sub>-pd and CuN<sub>3</sub>-pd, (e) Cu/NbN<sub>3</sub>-pd/pl, Cu/NbN<sub>4</sub>-pd, NbN<sub>3</sub>-pd/pl and NbN<sub>4</sub>-pd, (f) Cu/MoN<sub>3</sub>-pd and MoN<sub>3</sub>-pd.

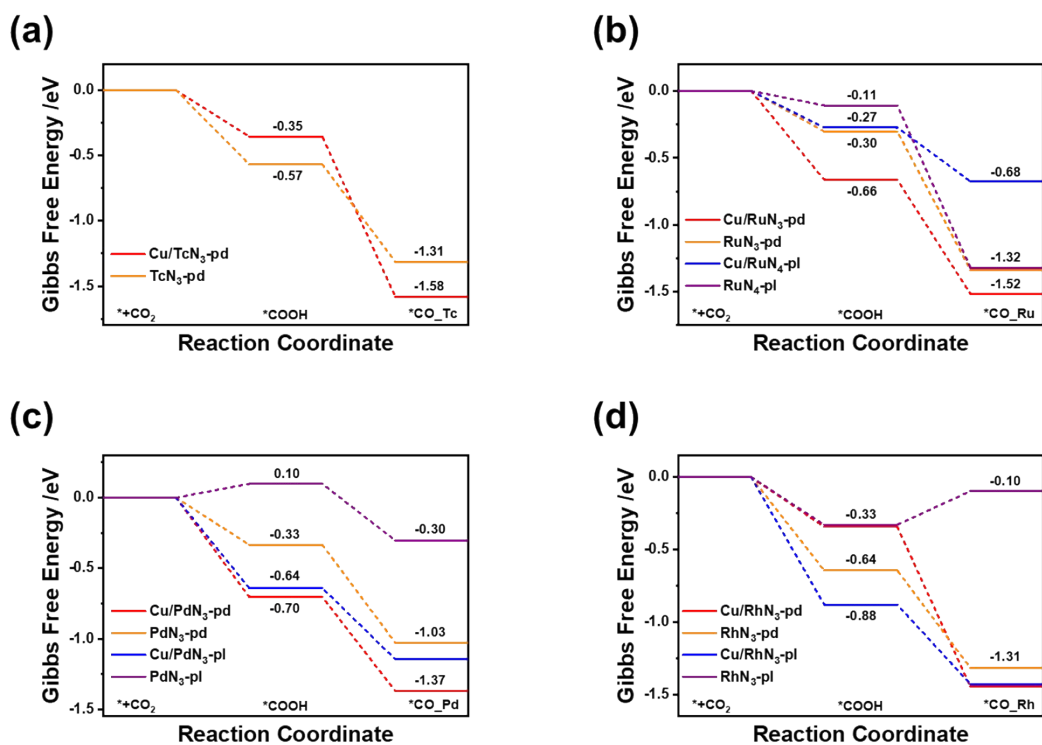

**Fig. S7** Gibbs free energy step diagram of reducing CO<sub>2</sub> to \*CO on (a) Cu/TcN<sub>3</sub>-pd and TcN<sub>3</sub>-pd, (b) Cu/RuN<sub>3</sub>-pd, Cu/RuN<sub>4</sub>-pl, RuN<sub>3</sub>-pd and RuN<sub>3</sub>-pl, (c) Cu/PdN<sub>3</sub>-pd/pl and PdN<sub>3</sub>-pd/pl, (d) Cu/RhN<sub>3</sub>-pd/pl and RhN<sub>3</sub>-pd/pl.

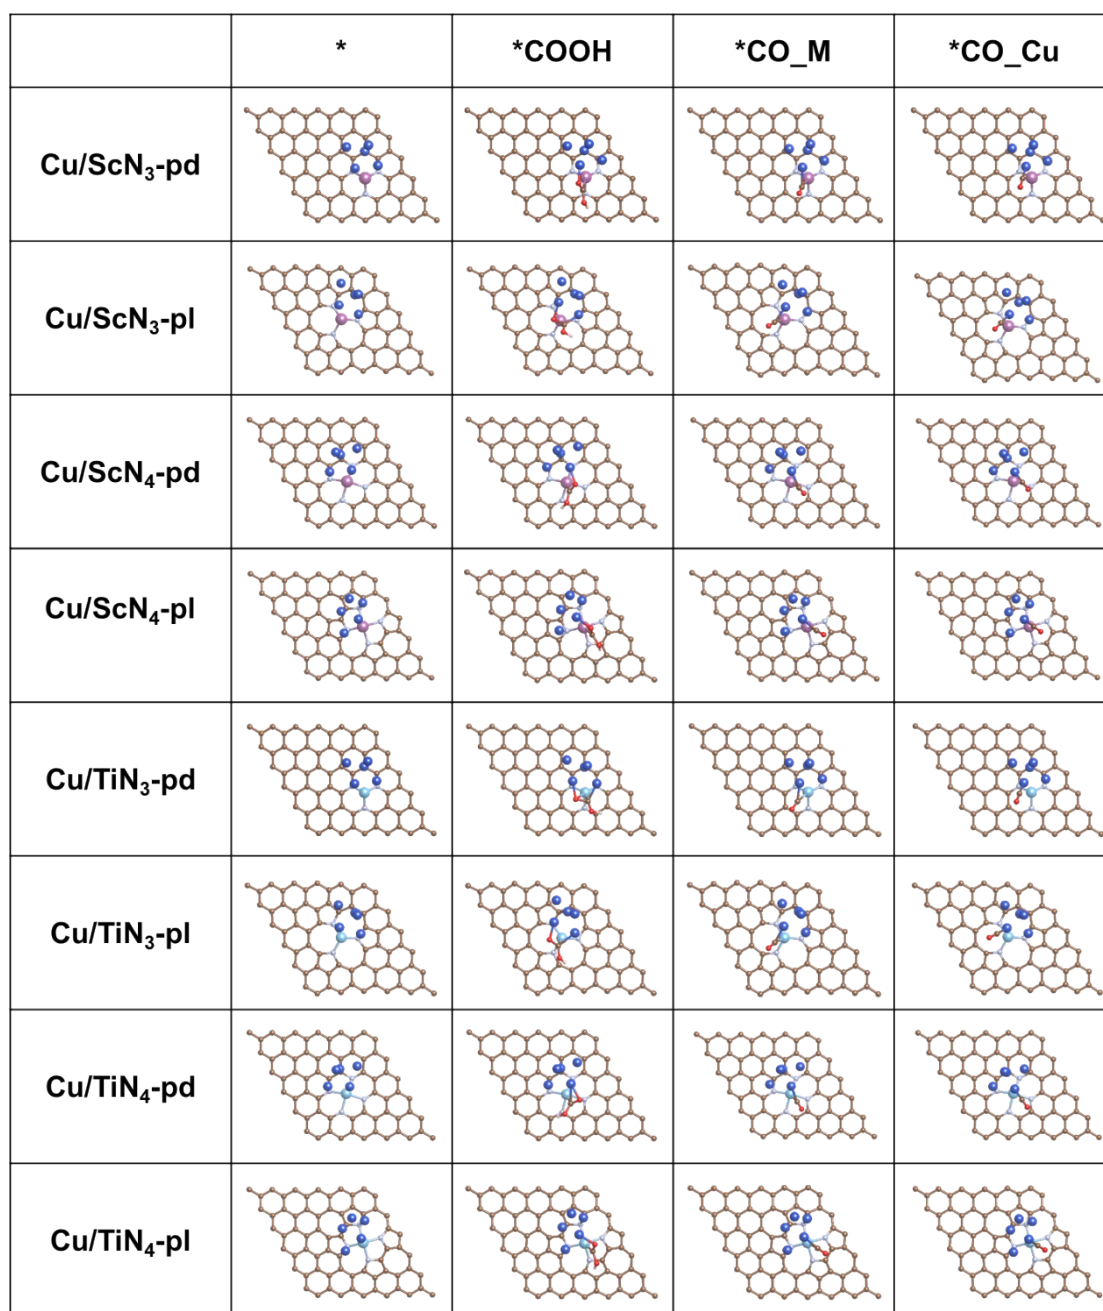

**Fig. S8 Model diagrams of different reaction intermediates on the Cu/ScN<sub>3/4</sub>-pd/pl and Cu/TiN<sub>3/4</sub>-pd/pl structures.**

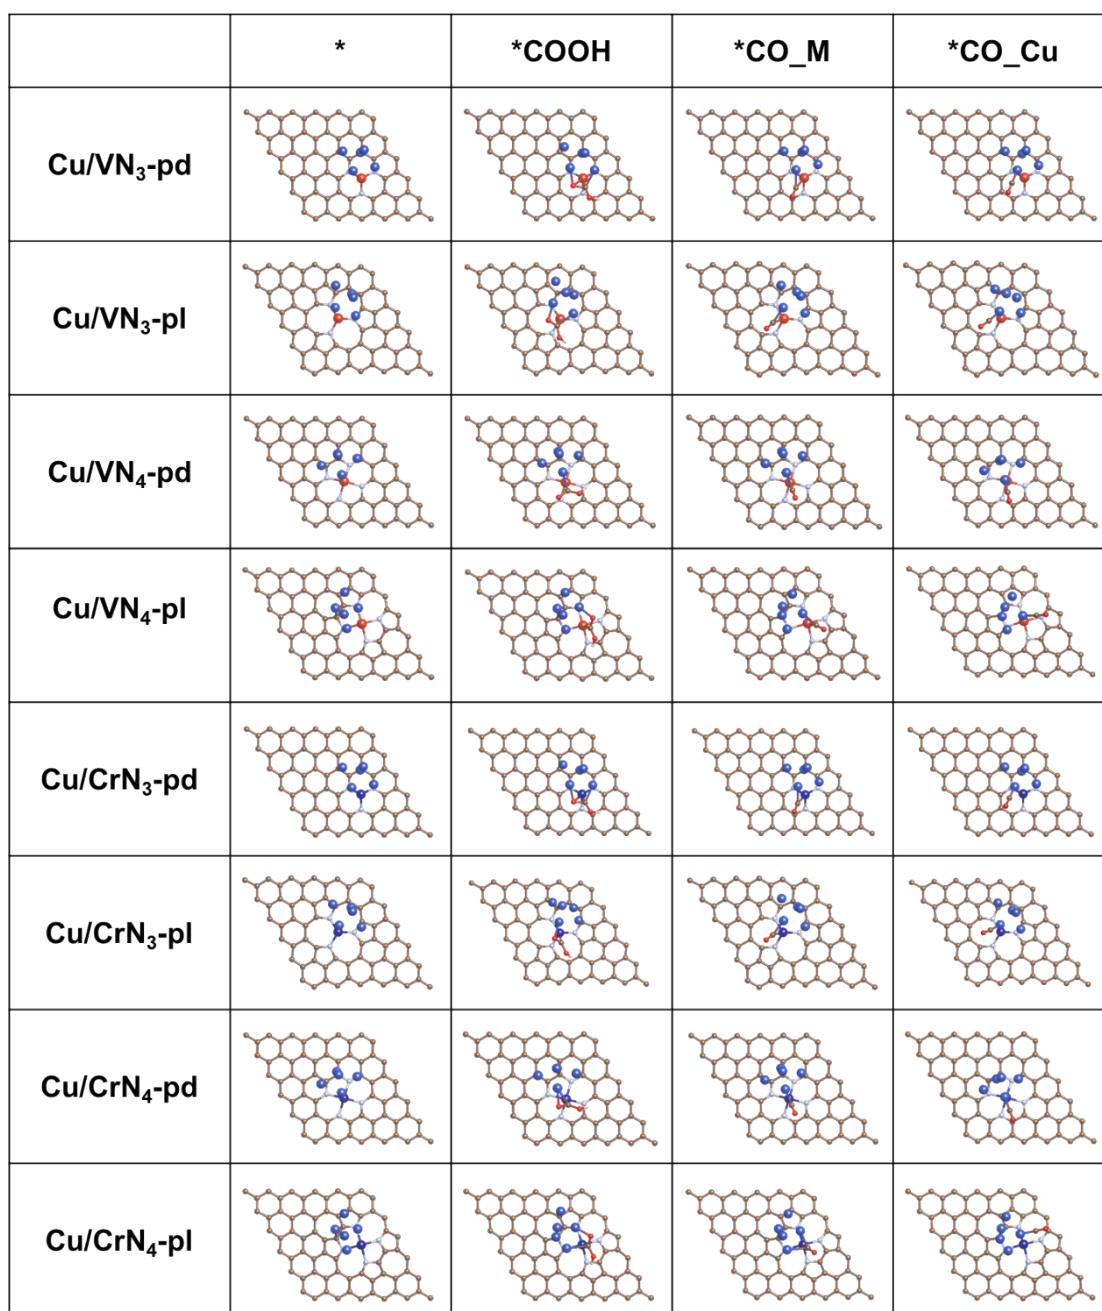

**Fig. S9 Model diagrams of different reaction intermediates on the Cu/VN<sub>3/4</sub>-pd/pl and Cu/CrN<sub>3/4</sub>-pd/pl structures.**

|                              | *                                                                                   | *COOH                                                                               | *CO_M                                                                                | *CO_Cu                                                                                |
|------------------------------|-------------------------------------------------------------------------------------|-------------------------------------------------------------------------------------|--------------------------------------------------------------------------------------|---------------------------------------------------------------------------------------|
| <b>Cu/MnN<sub>3</sub>-pd</b> | 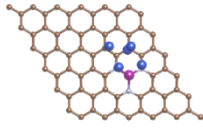   |    |    |    |
| <b>Cu/MnN<sub>3</sub>-pl</b> |    |    |    |    |
| <b>Cu/MnN<sub>4</sub>-pd</b> |    |    |    | ×                                                                                     |
| <b>Cu/MnN<sub>4</sub>-pl</b> |    |    |    |    |
| <b>Cu/FeN<sub>3</sub>-pd</b> |   |   |   |   |
| <b>Cu/FeN<sub>3</sub>-pl</b> |  |  |  |  |
| <b>Cu/FeN<sub>4</sub>-pd</b> |  |  |  |  |
| <b>Cu/FeN<sub>4</sub>-pl</b> |  |  |  |  |

**Fig. S10 Model diagrams of different reaction intermediates on the Cu/MnN<sub>3/4</sub>-pd/pl and Cu/FeN<sub>3/4</sub>-pd/pl structures.**

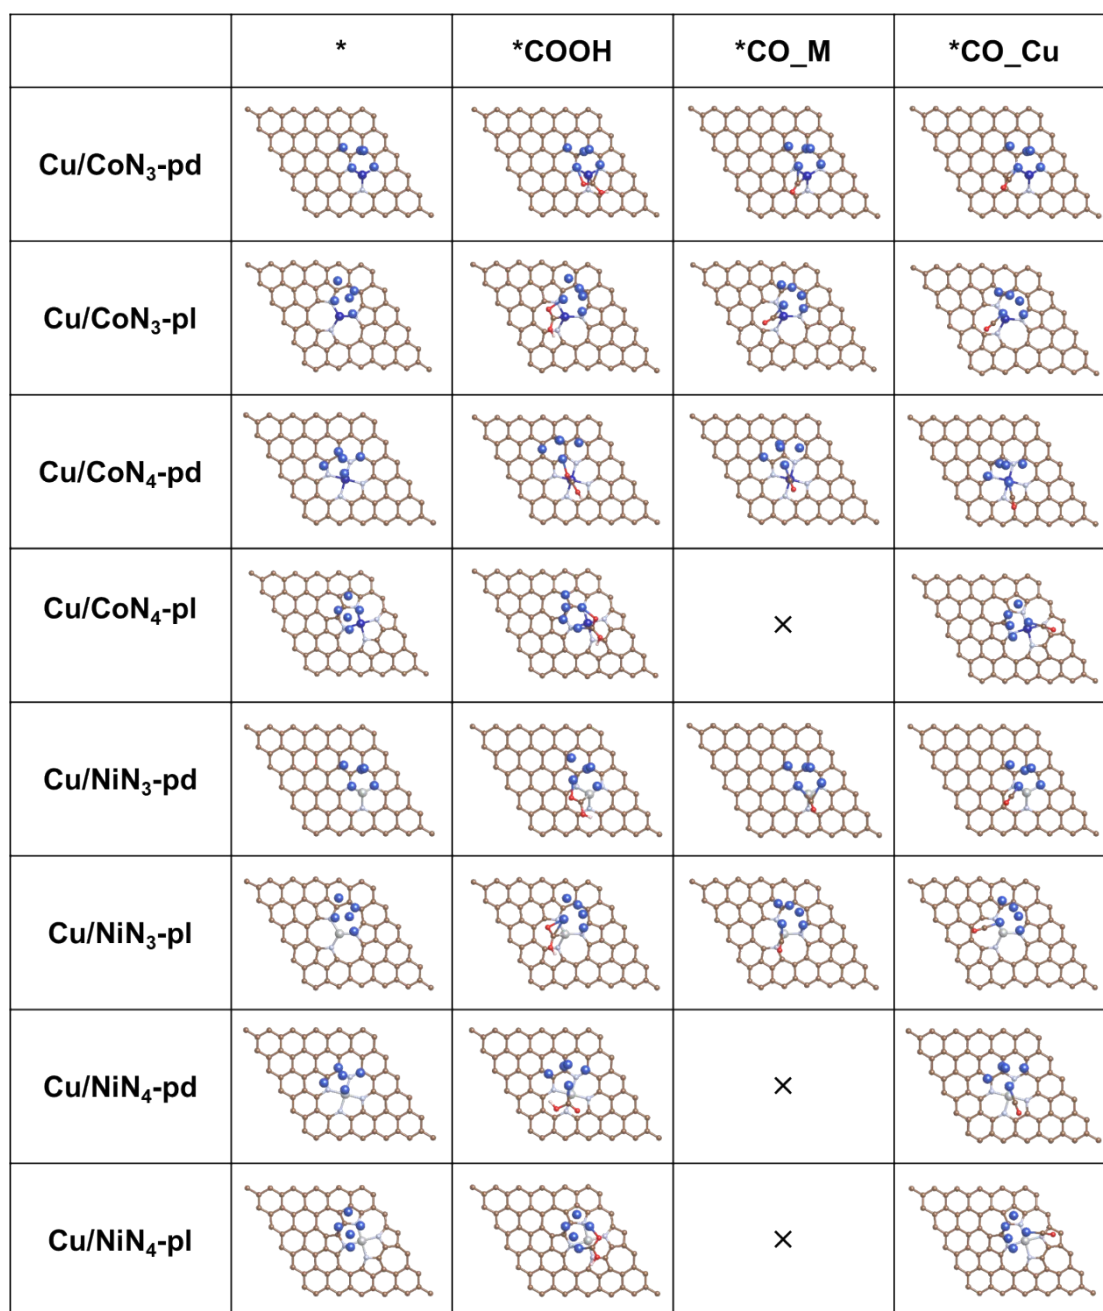

**Fig. S11 Model diagrams of different reaction intermediates on the Cu/CoN<sub>3/4</sub>-pd/pl and Cu/NiN<sub>3/4</sub>-pd/pl structures.**



|                              | *                                                                                   | *COOH                                                                               | *CO_M                                                                               | *CO_Cu                                                                                |
|------------------------------|-------------------------------------------------------------------------------------|-------------------------------------------------------------------------------------|-------------------------------------------------------------------------------------|---------------------------------------------------------------------------------------|
| <b>Cu/CuN<sub>3</sub>-pd</b> | 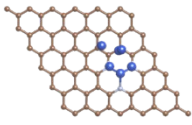   |    |   |    |
| <b>Cu/CuN<sub>3</sub>-pl</b> |    |    |   |    |
| <b>Cu/CuN<sub>4</sub>-pd</b> |    |    | ×                                                                                   |    |
| <b>Cu/CuN<sub>4</sub>-pl</b> |    |    | ×                                                                                   |    |
| <b>Cu/ZnN<sub>3</sub>-pd</b> |   |   |  |   |
| <b>CuZnN<sub>3</sub>-pl</b>  |  |  | ×                                                                                   |  |
| <b>Cu/ZnN<sub>4</sub>-pd</b> |  |  | ×                                                                                   |  |
| <b>Cu/ZnN<sub>4</sub>-pl</b> |  |  | ×                                                                                   |  |

**Fig. S12 Model diagrams of different reaction intermediates on the Cu/CuN<sub>3/4</sub>-pd/pl and Cu/ZnN<sub>3/4</sub>-pd/pl structures.**

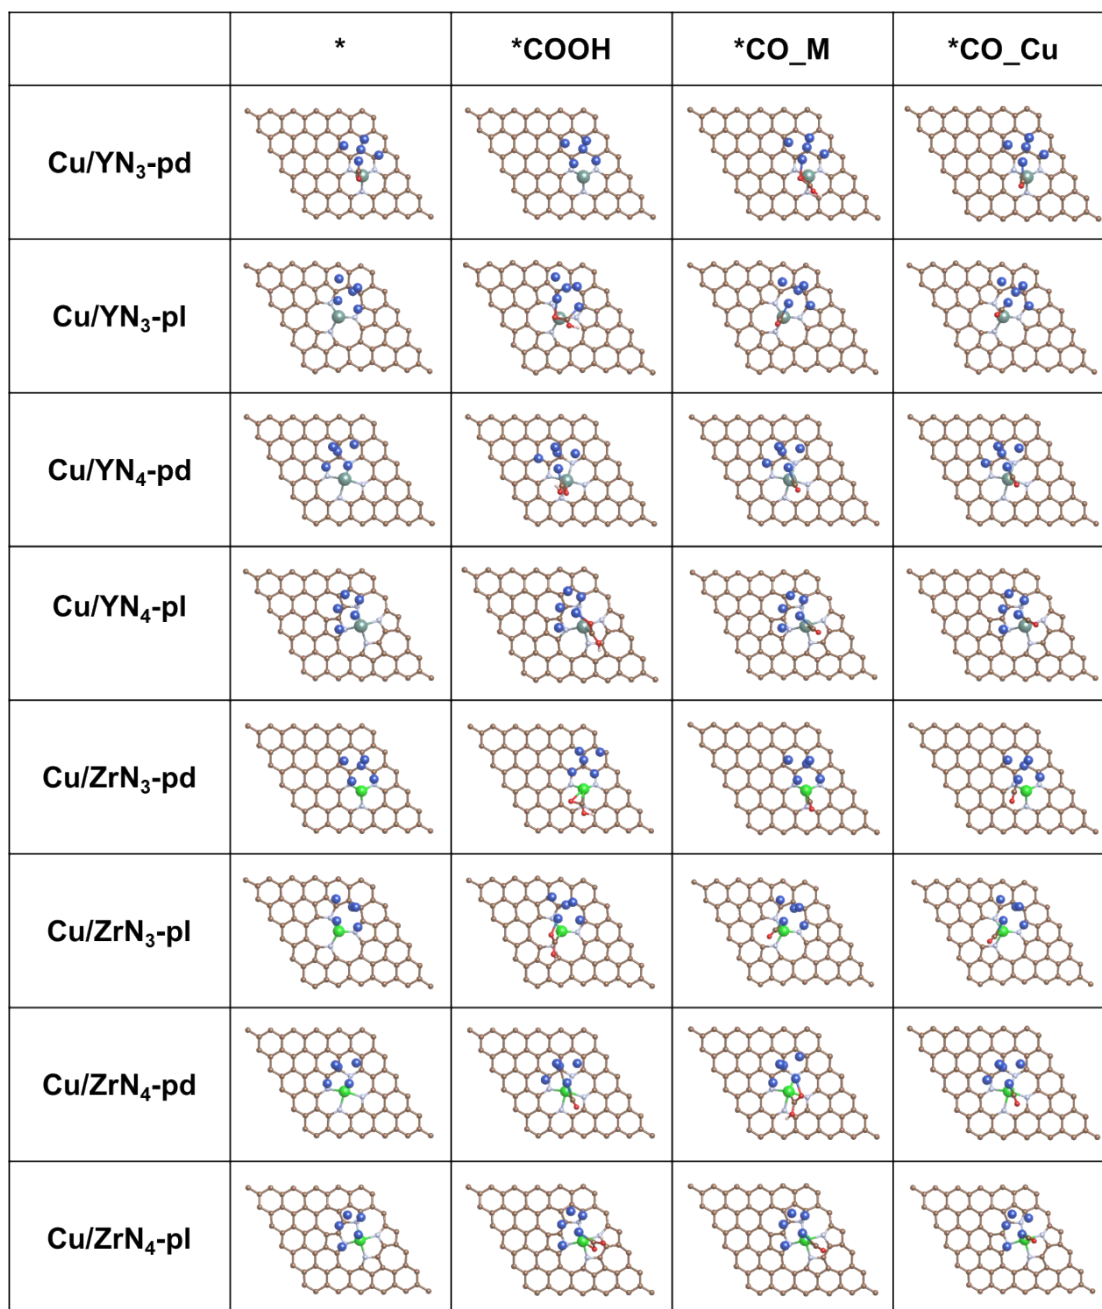

**Fig. S13 Model diagrams of different reaction intermediates on the Cu/YN<sub>3/4</sub>-pd/pl and Cu/ZrN<sub>3/4</sub>-pd/pl structures.**

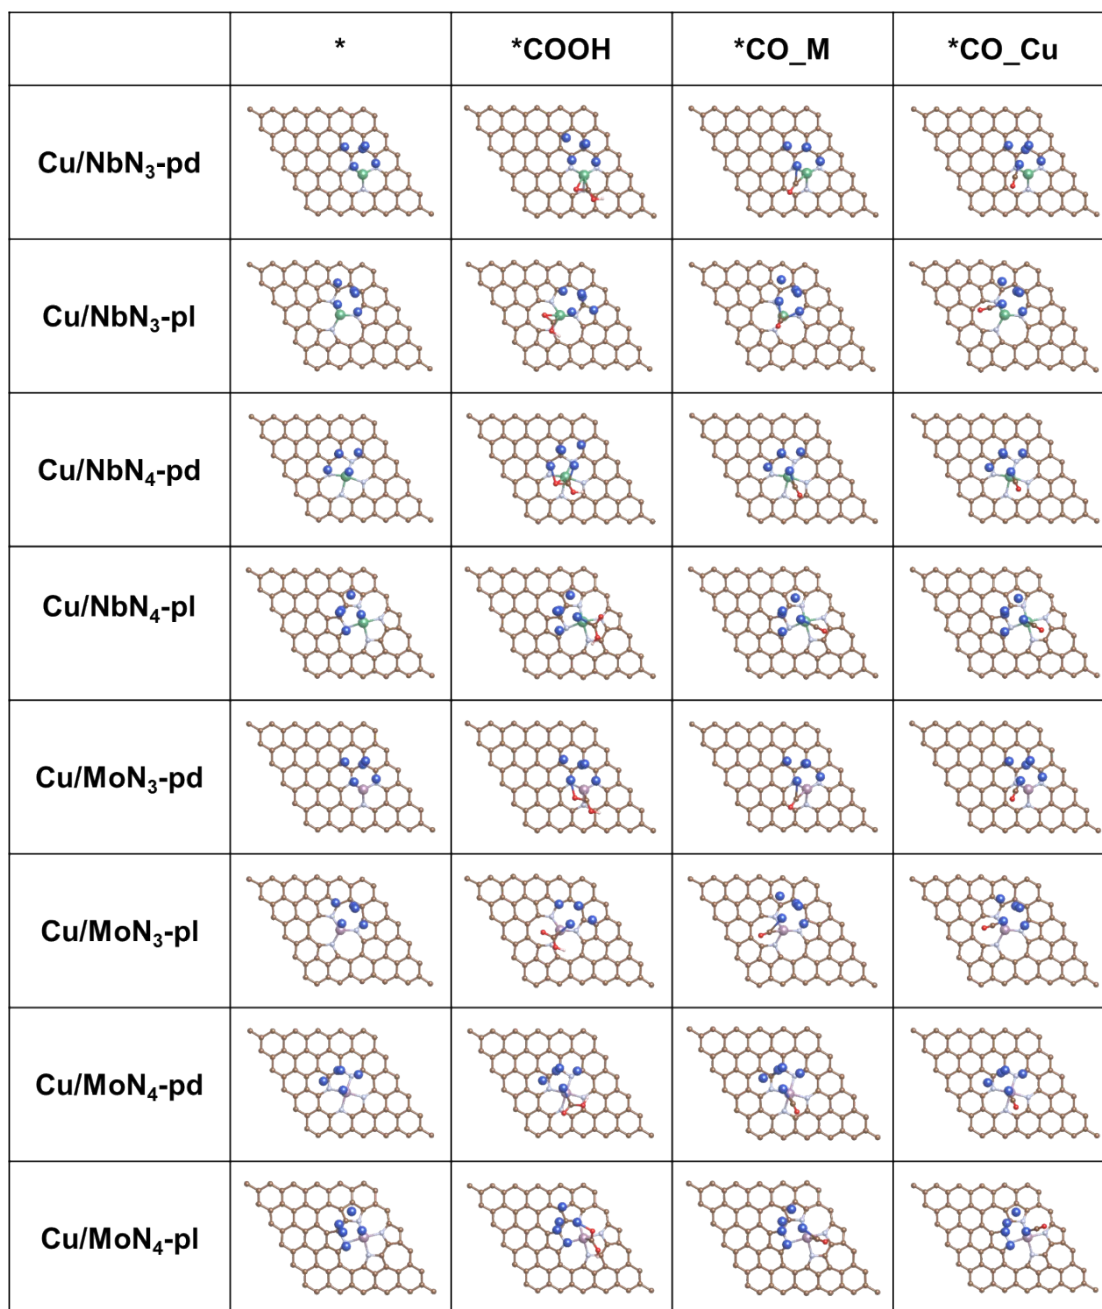

**Fig. S14 Model diagrams of different reaction intermediates on the Cu/NbN<sub>3/4</sub>-pd/pl and Cu/MoN<sub>3/4</sub>-pd/pl structures.**

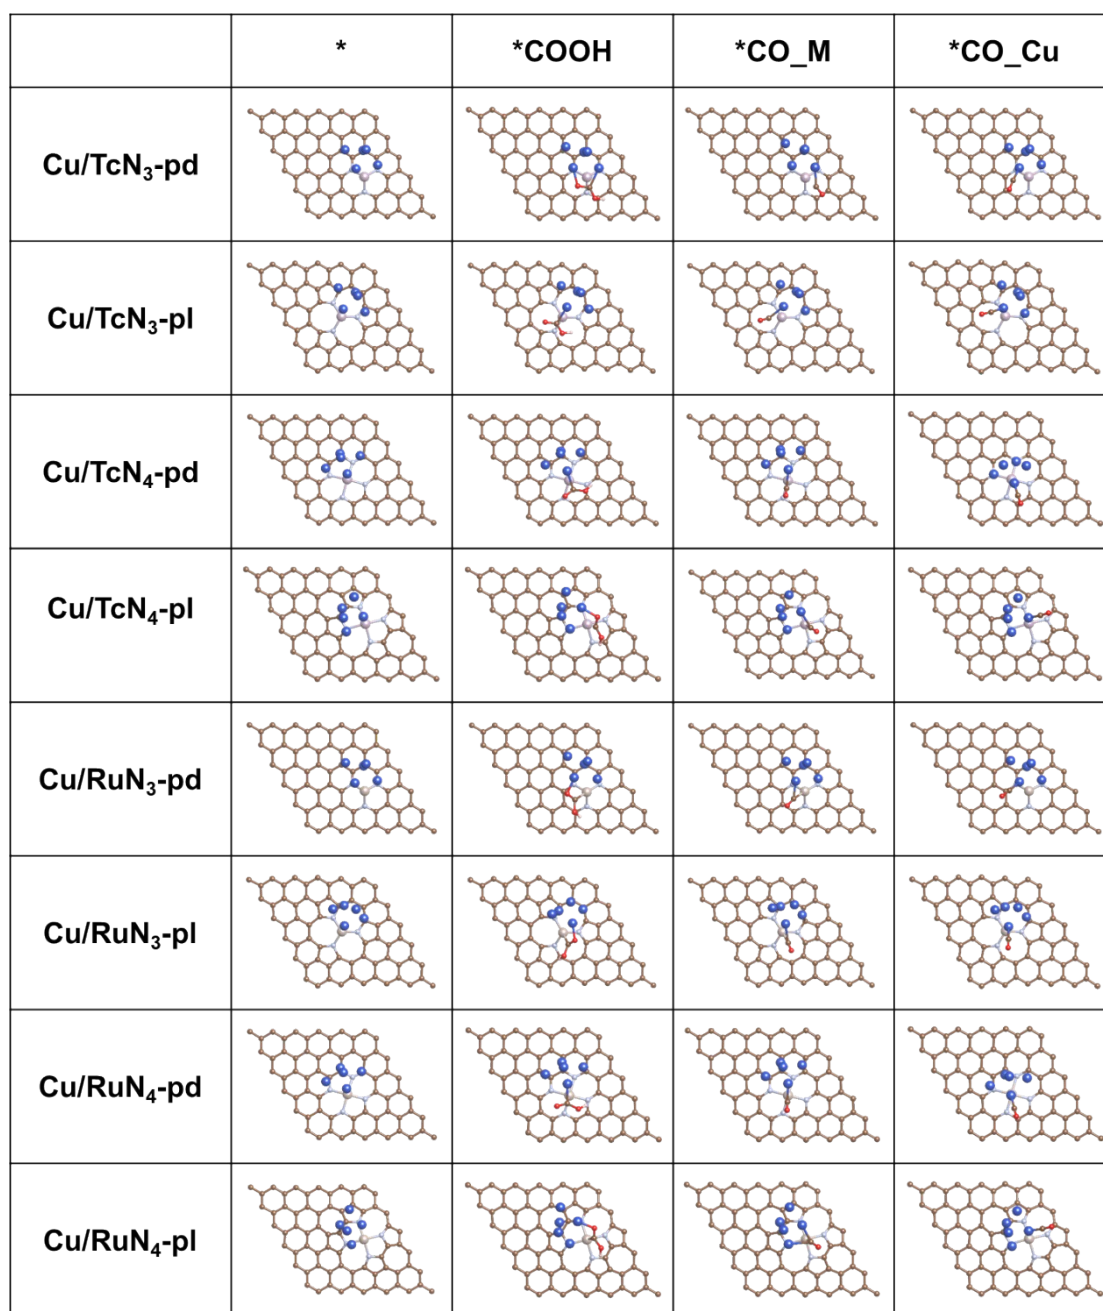

**Fig. S15 Model diagrams of different reaction intermediates on the Cu/TcN<sub>3/4</sub>-pd/pl and Cu/RuN<sub>3/4</sub>-pd/pl structures.**

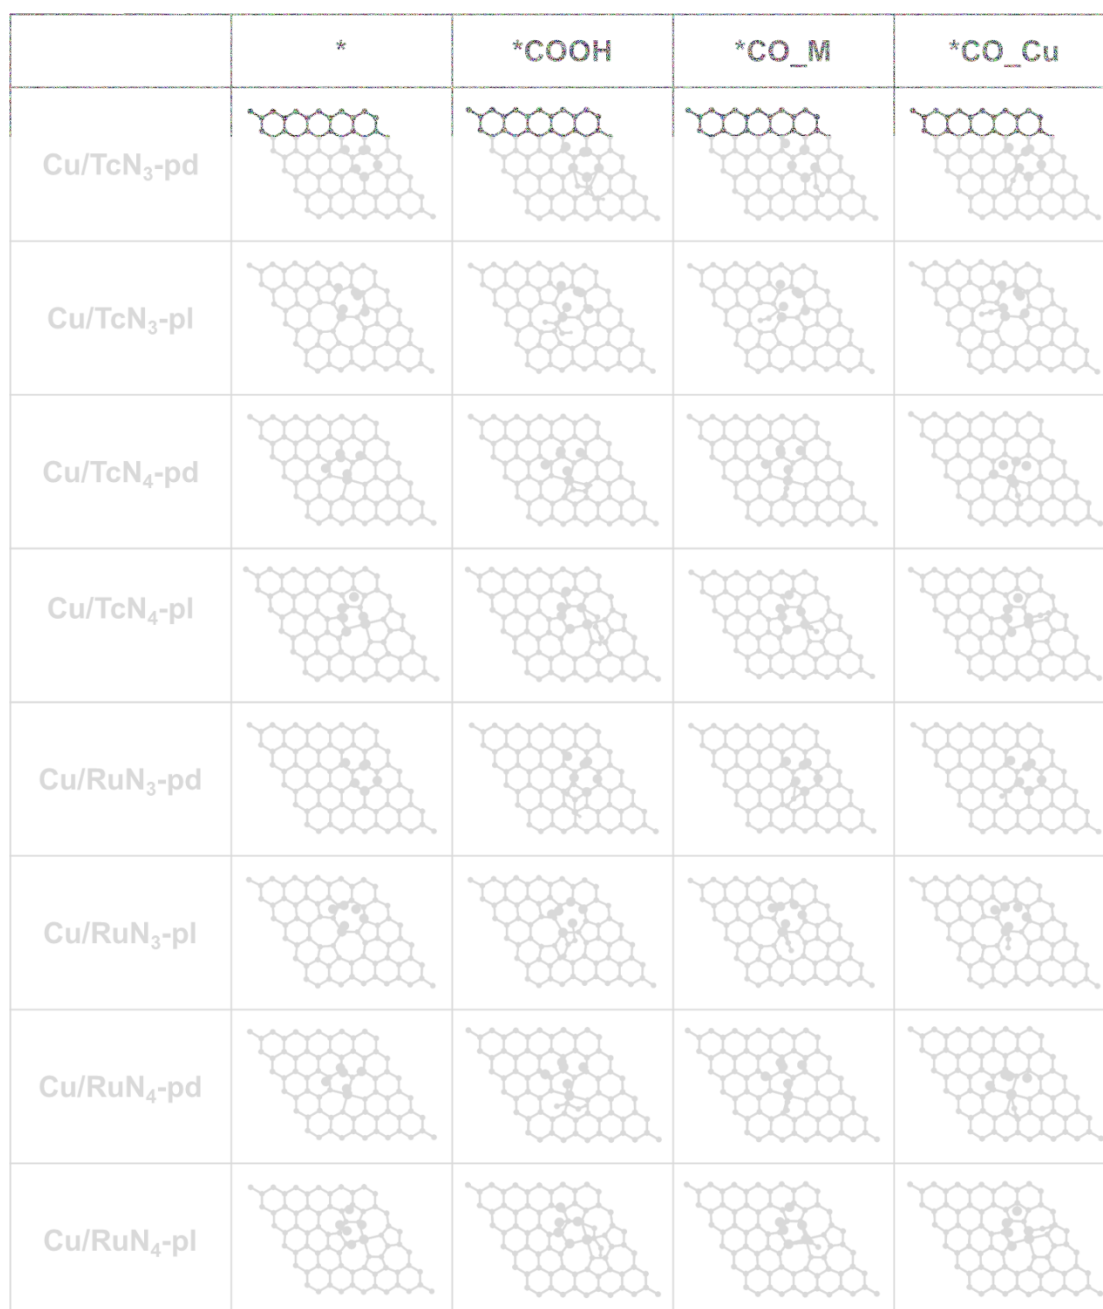

**Fig. S16 Model diagrams of different reaction intermediates on the Cu/RhN<sub>3/4</sub>-pd/pl and Cu/PdN<sub>3/4</sub>-pd/pl structures.**

|                              | *                                                                                   | *COOH                                                                               | *CO_M                                                                                | *CO_Cu                                                                                |
|------------------------------|-------------------------------------------------------------------------------------|-------------------------------------------------------------------------------------|--------------------------------------------------------------------------------------|---------------------------------------------------------------------------------------|
| <b>Cu/AgN<sub>3</sub>-pd</b> | 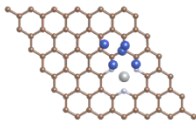   |    |    |    |
| <b>Cu/AgN<sub>3</sub>-pl</b> |    |    |    | ×                                                                                     |
| <b>Cu/AgN<sub>4</sub>-pd</b> |    |    |    |    |
| <b>Cu/AgN<sub>4</sub>-pl</b> |    |    | ×                                                                                    |    |
| <b>Cu/CdN<sub>3</sub>-pd</b> |   |   |   |   |
| <b>Cu/CdN<sub>3</sub>-pl</b> |  |  |  |  |
| <b>Cu/CdN<sub>4</sub>-pd</b> |  |  |  |  |
| <b>Cu/CdN<sub>4</sub>-pl</b> |  |  |  | ×                                                                                     |

**Fig. S17 Model diagrams of different reaction intermediates on the Cu/AgN<sub>3/4</sub>-pd/pl and Cu/CdN<sub>3/4</sub>-pd/pl structures.**



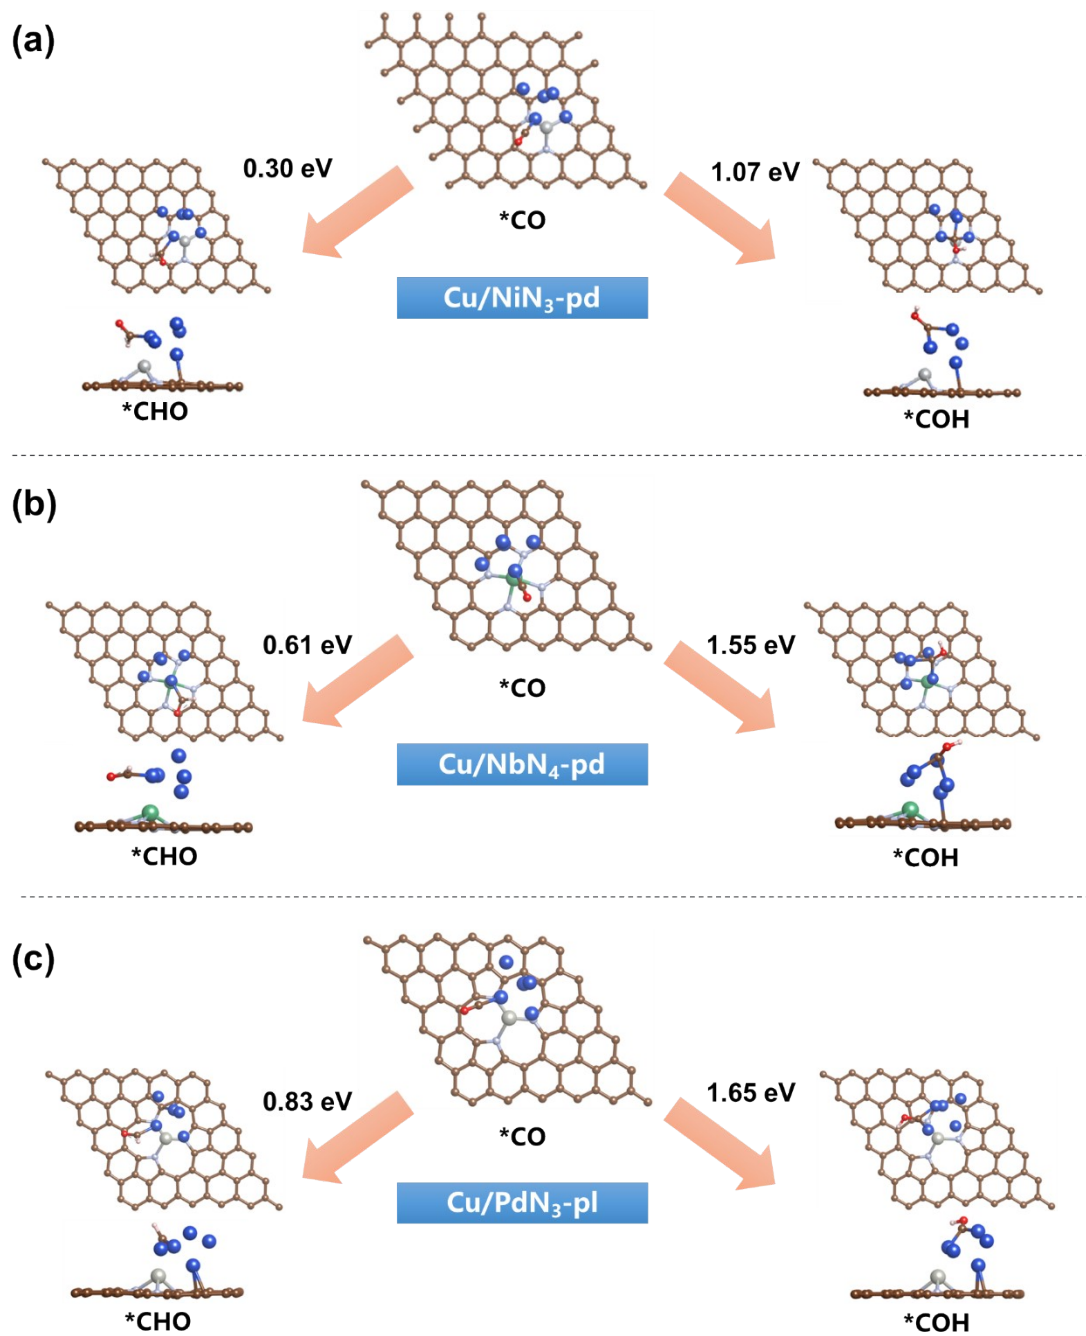

**Fig. S18** Schematic diagrams and Gibbs free energy change of  $\text{*CO}$  hydrogenation conversion to  $\text{*CHO}$  or  $\text{*COH}$  on (a) Cu/NiN<sub>3</sub>-pd, (b) Cu/NbN<sub>4</sub>-pd and (c) Cu/PdN<sub>3</sub>-pl, respectively.

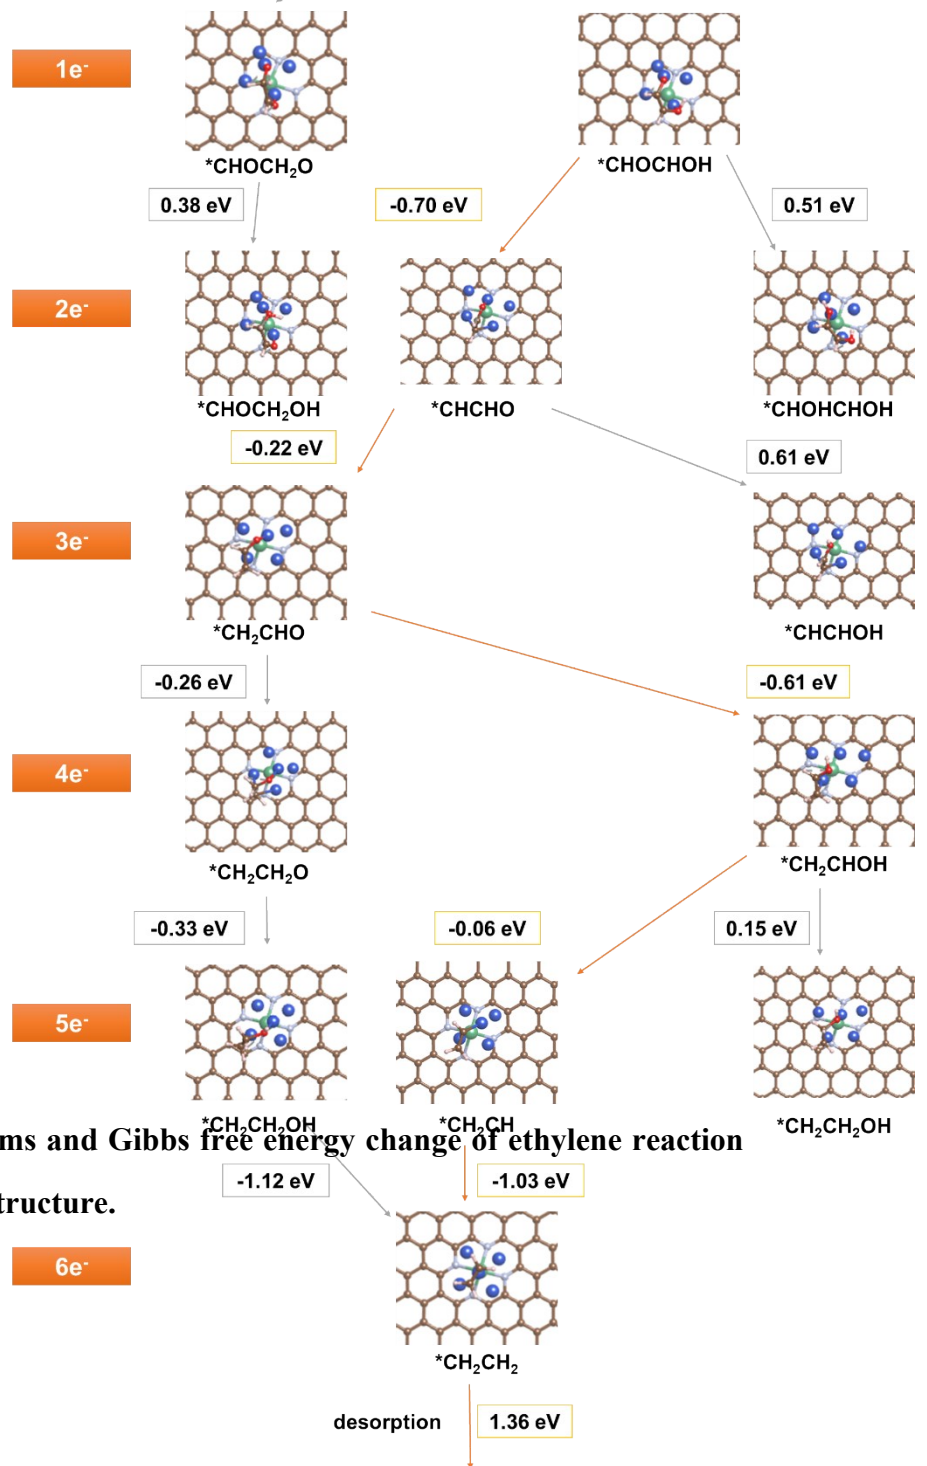

Fig. S19 Schematic diagrams and Gibbs free energy change of ethylene reaction pathway on Cu/NbN<sub>4</sub>-pd structure.



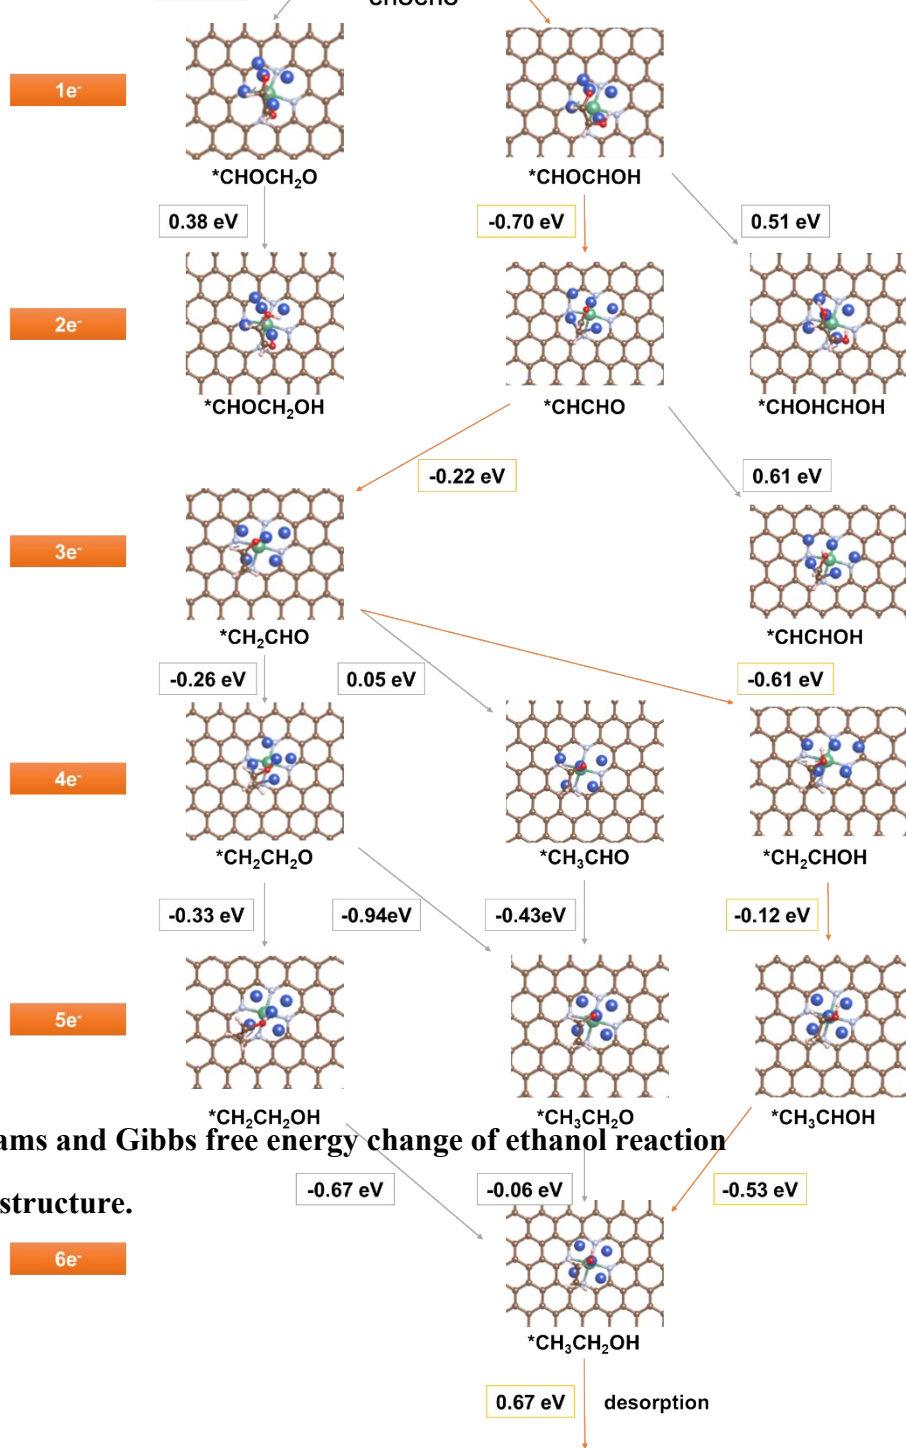

**Fig. S20 Schematic diagrams and Gibbs free energy change of ethanol reaction pathway on Cu/NbN<sub>4</sub>-pd structure.**

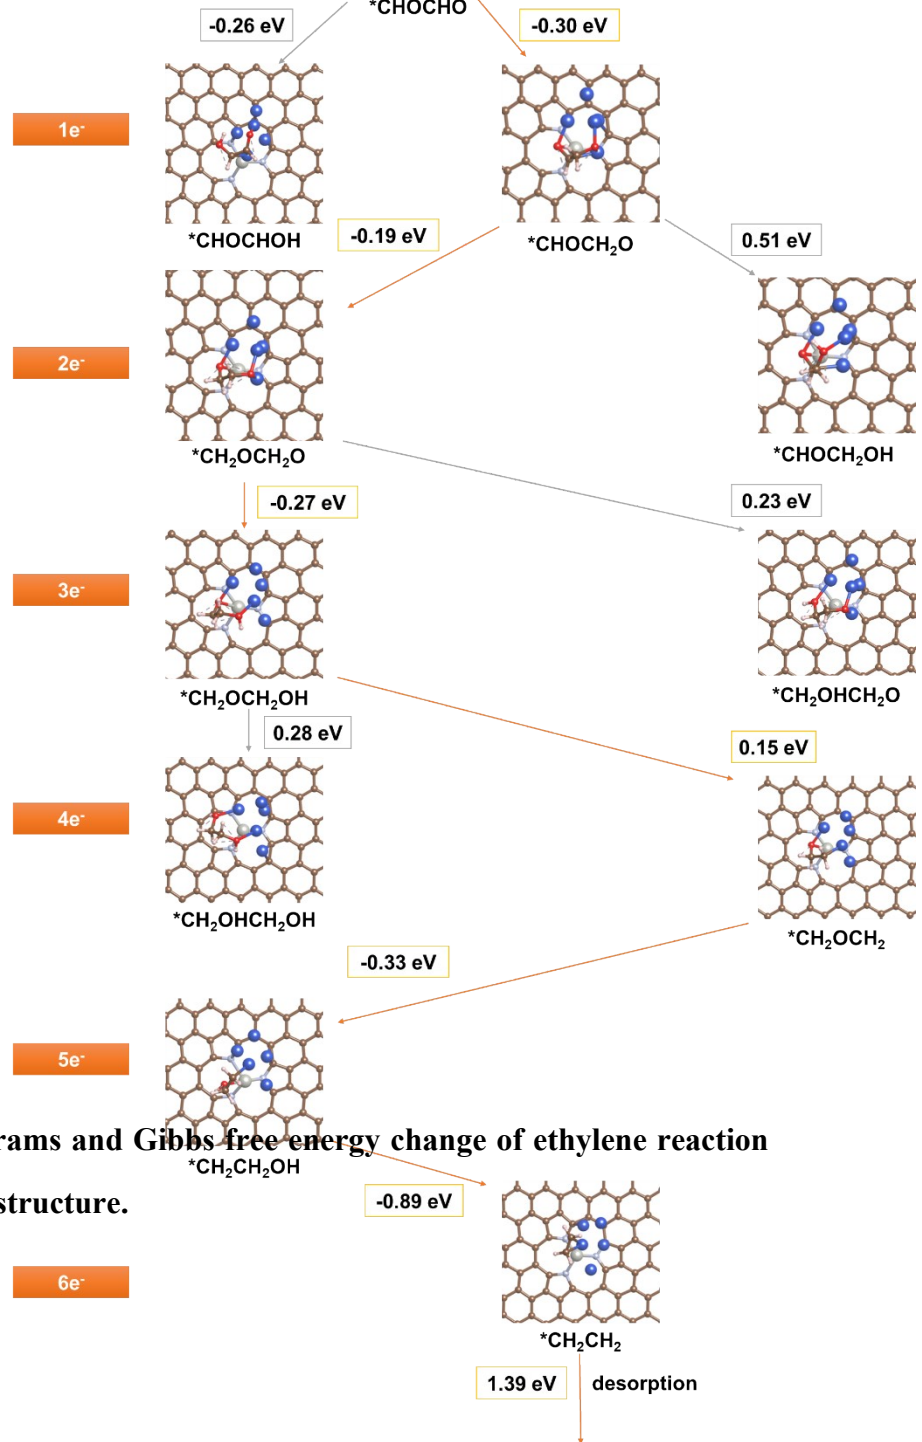

**Fig. S21 Schematic diagrams and Gibbs free energy change of ethylene reaction pathway on Cu/PdN<sub>3</sub>-pl structure.**

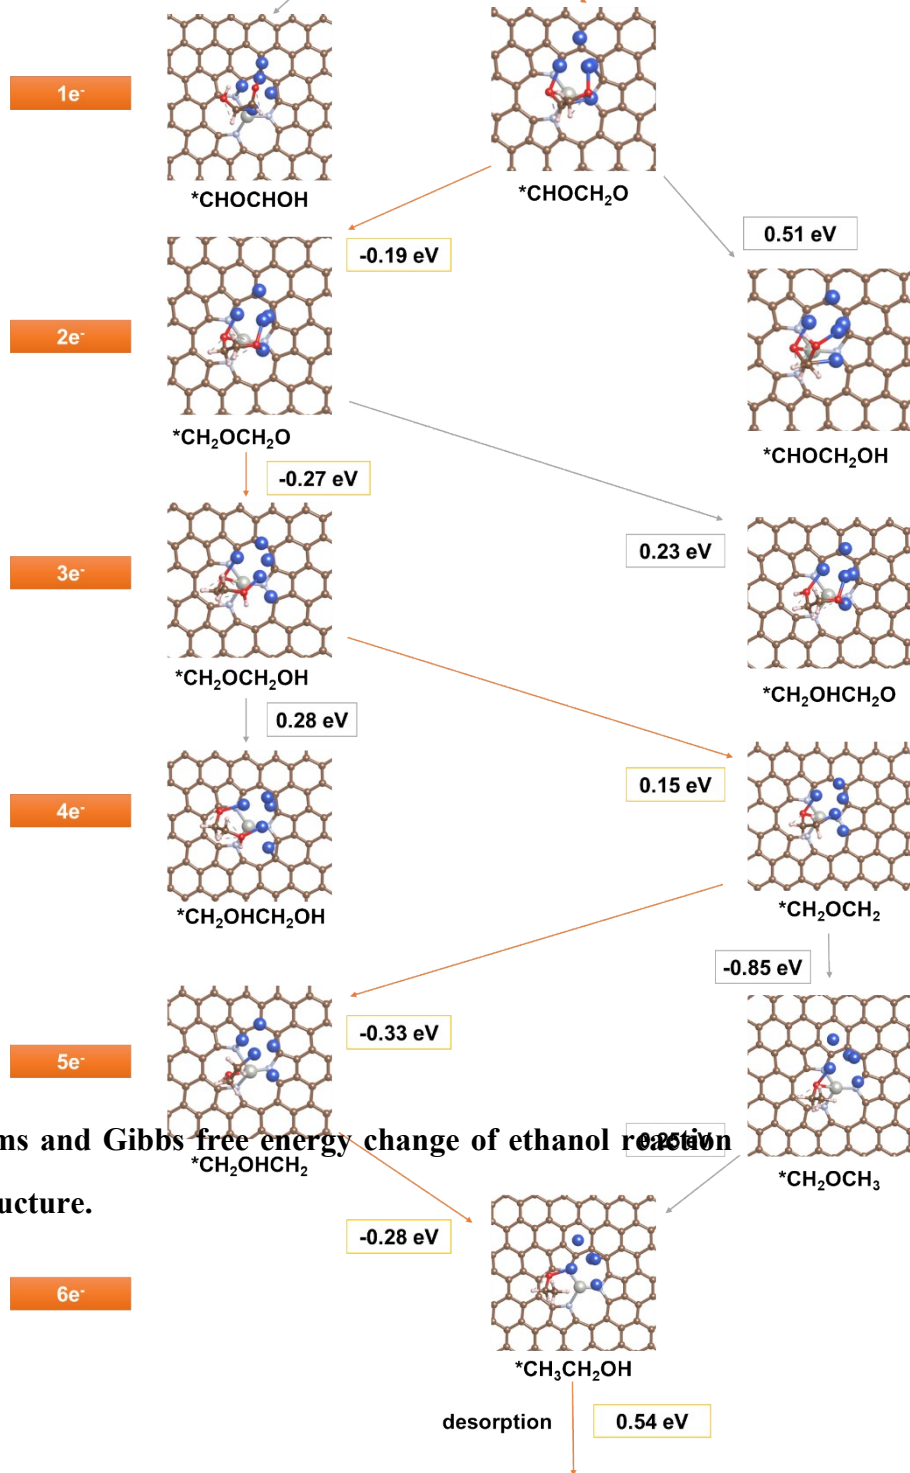

Fig. S22 Schematic diagrams and Gibbs free energy change of ethanol reduction pathway on Cu/PdN<sub>3</sub>-pl structure.

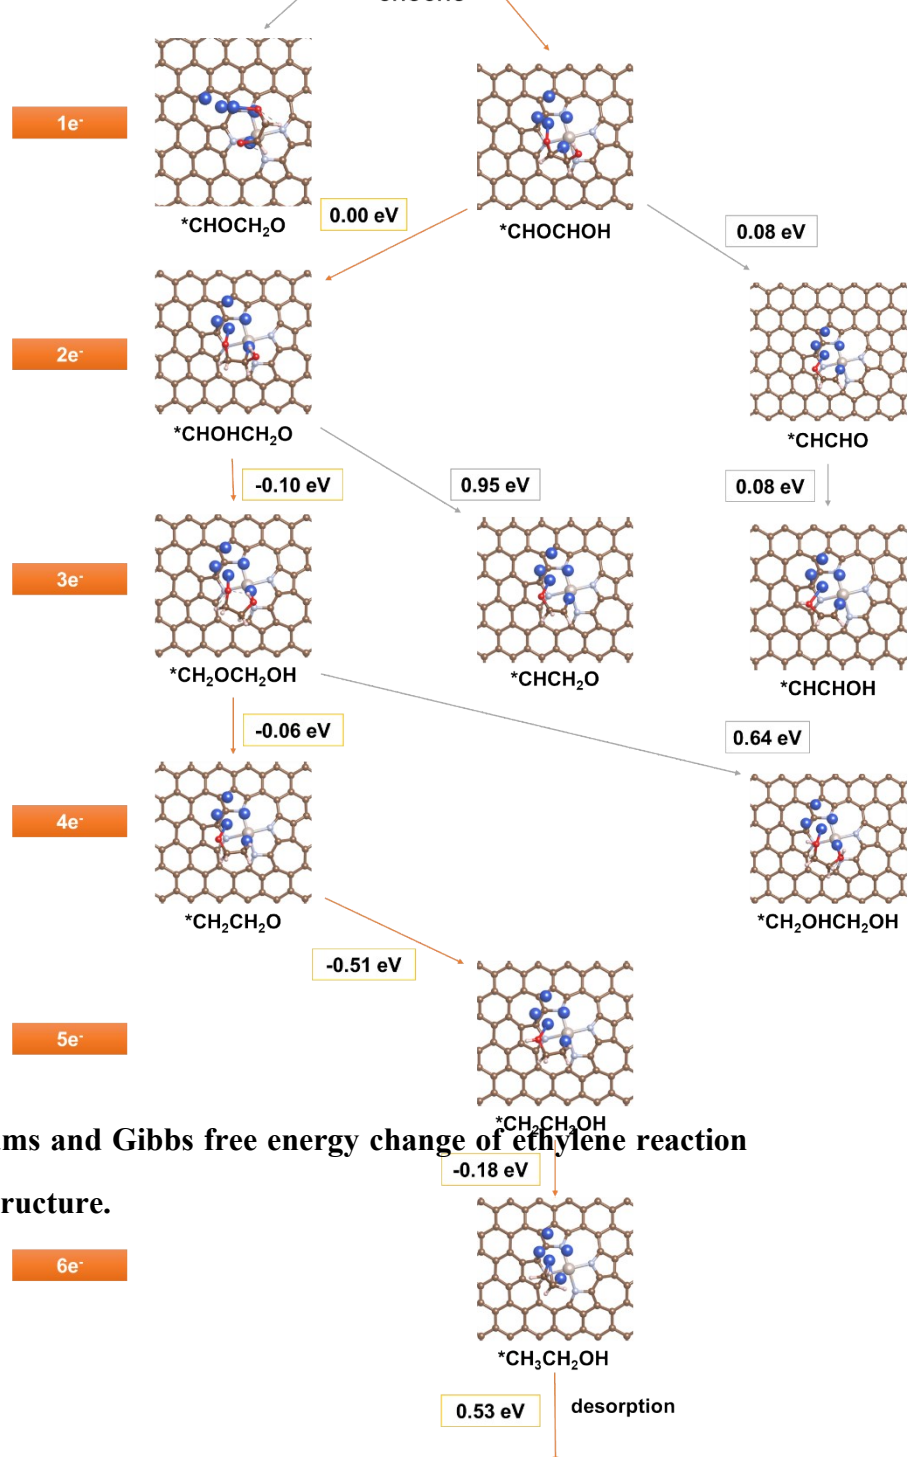

**Fig. S23 Schematic diagrams and Gibbs free energy change of ethylene reaction pathway on Cu/RuN<sub>4</sub>-pl structure.**

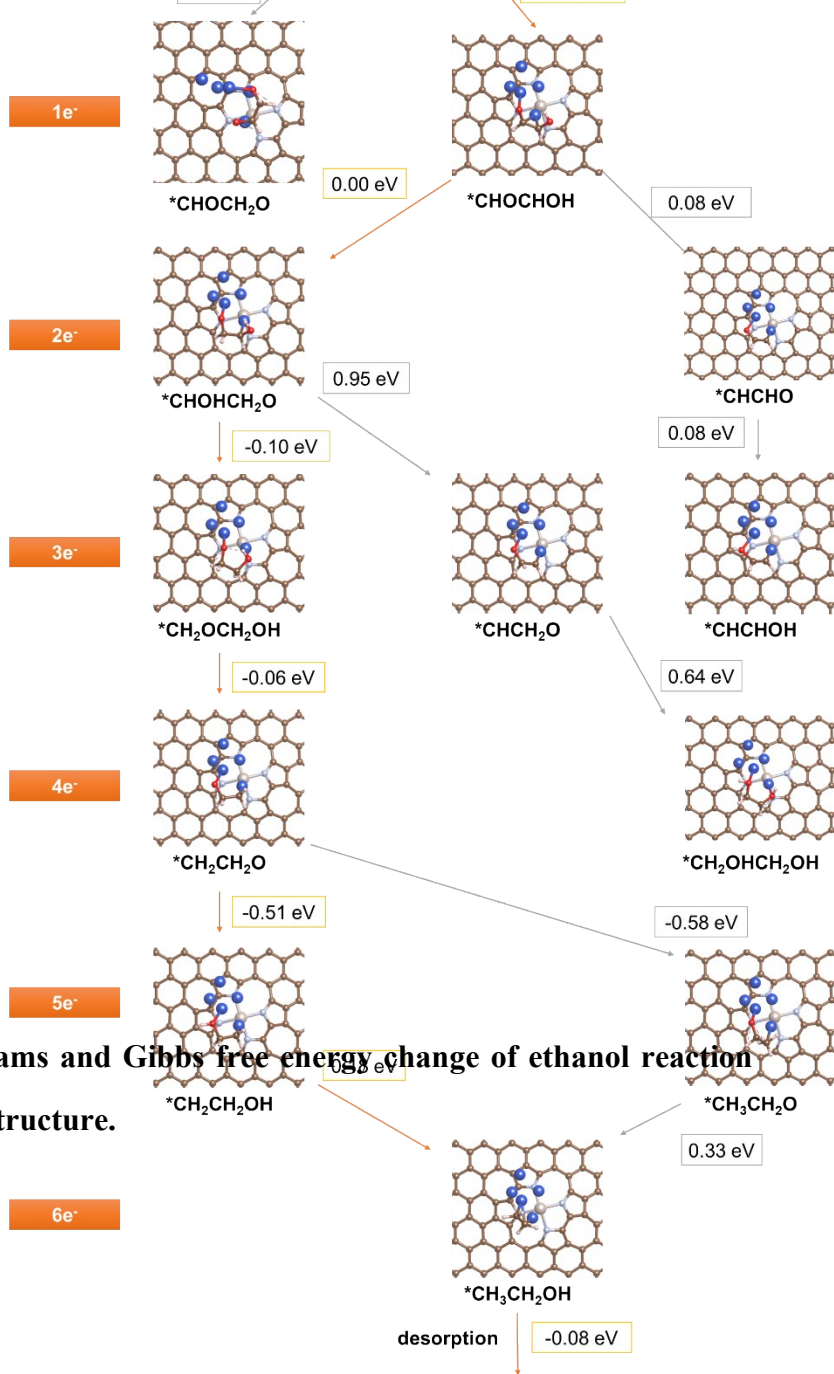

**Fig. S24 Schematic diagrams and Gibbs free energy change of ethanol reaction pathway on Cu/RuN<sub>4</sub>-pl structure.**

(a)

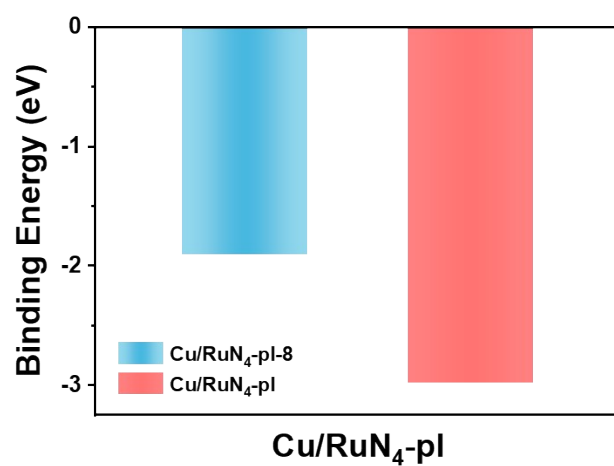

(b)

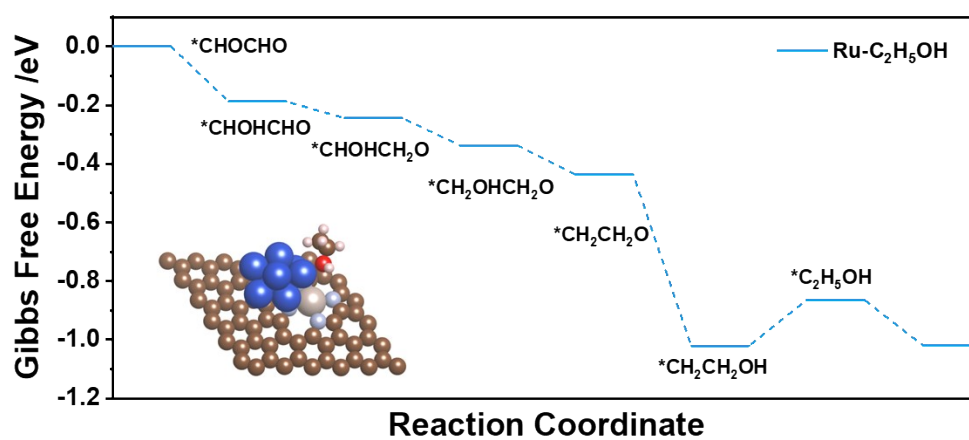

Fig. S25 (a) Comparison of binding energy between Cu/RuN<sub>4</sub>-pl-8 and Cu/RuN<sub>4</sub>-pl. (b) Gibbs reaction free energy diagrams for the ethanol pathway of Cu/RuN<sub>4</sub>-pl-8.

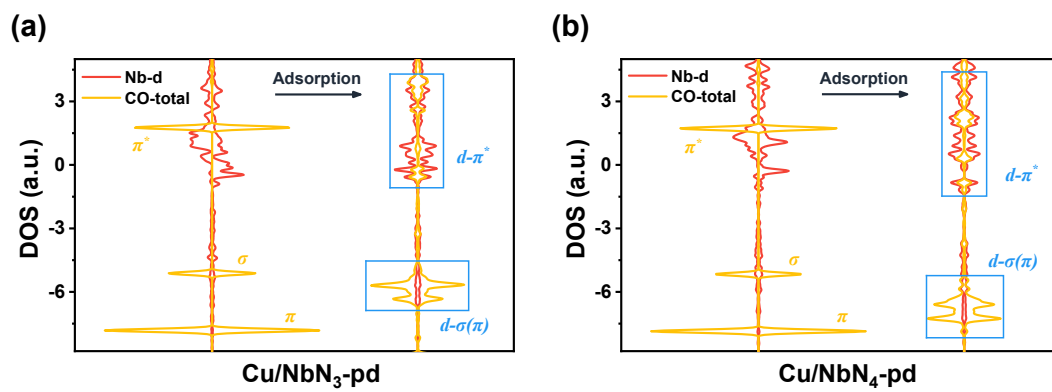

Fig. S26 DOS of before and after CO<sub>2</sub> adsorption on (a) Cu/NbN<sub>3</sub>-pd and (b) Cu/NbN<sub>4</sub>-pd.

**Table S1. Bader charge data of Cu/NbN<sub>3</sub>-pd.**

| Atom | X     | Y    | Z    | CHARGE | Atom | X     | Y     | Z    | CHARGE |
|------|-------|------|------|--------|------|-------|-------|------|--------|
| C1   | 0.03  | 1.46 | 1.97 | 4.08   | C41  | 6.20  | 7.83  | 2.23 | 4.11   |
| C2   | 1.26  | 0.76 | 1.97 | 3.91   | C42  | 7.48  | 7.14  | 2.04 | 3.44   |
| C3   | 2.50  | 1.47 | 2.01 | 3.97   | C43  | 8.68  | 7.88  | 1.88 | 4.13   |
| C4   | 3.73  | 0.75 | 1.99 | 3.99   | C44  | 9.91  | 7.17  | 1.83 | 3.88   |
| C5   | 4.96  | 1.45 | 2.07 | 4.11   | C45  | -4.91 | 10.02 | 1.86 | 3.96   |
| C6   | 6.19  | 0.74 | 2.04 | 3.88   | C46  | -3.68 | 9.30  | 1.82 | 4.16   |
| C7   | 7.43  | 1.45 | 2.07 | 3.99   | C47  | -2.44 | 10.02 | 1.84 | 3.79   |
| C8   | 8.66  | 0.75 | 1.99 | 3.94   | C48  | -1.21 | 9.30  | 1.83 | 3.95   |
| C9   | 9.89  | 1.47 | 2.00 | 4.15   | C49  | 0.03  | 10.02 | 1.87 | 4.14   |
| C10  | 11.13 | 0.76 | 1.97 | 3.96   | C50  | 1.26  | 9.30  | 1.88 | 3.96   |
| C11  | 12.36 | 1.46 | 1.97 | 4.17   | C51  | 2.49  | 10.02 | 1.92 | 3.96   |
| C12  | 13.60 | 0.75 | 1.97 | 3.76   | C52  | 3.72  | 9.31  | 1.97 | 4.13   |
| C13  | -1.21 | 3.60 | 1.91 | 3.95   | C53  | 4.97  | 10.01 | 2.02 | 3.93   |
| C14  | 0.03  | 2.89 | 1.96 | 4.16   | C54  | 6.20  | 9.29  | 2.09 | 4.01   |
| C15  | 1.27  | 3.60 | 1.99 | 3.93   | C55  | 7.43  | 10.01 | 1.99 | 4.03   |
| C16  | 2.52  | 2.90 | 2.07 | 3.99   | C56  | 8.67  | 9.30  | 1.90 | 3.95   |
| C17  | 3.76  | 3.62 | 2.20 | 4.11   | C57  | -6.15 | 12.15 | 1.94 | 3.74   |
| C18  | 4.99  | 2.86 | 2.27 | 3.51   | C58  | -4.91 | 11.44 | 1.90 | 4.17   |
| C19  | 7.40  | 2.87 | 2.24 | 3.56   | C59  | -3.68 | 12.15 | 1.92 | 3.97   |
| C20  | 8.63  | 3.62 | 2.14 | 4.12   | C60  | -2.45 | 11.44 | 1.89 | 4.13   |
| C21  | 9.87  | 2.90 | 2.02 | 3.92   | C61  | -1.21 | 12.15 | 1.94 | 4.08   |
| C22  | 11.12 | 3.60 | 1.94 | 4.10   | C62  | 0.03  | 11.44 | 1.91 | 3.94   |
| C23  | 12.36 | 2.89 | 1.93 | 3.96   | C63  | 1.26  | 12.15 | 1.94 | 3.74   |
| C24  | -2.44 | 5.74 | 1.84 | 3.72   | C64  | 2.49  | 11.44 | 1.94 | 4.17   |
| C25  | -1.21 | 5.02 | 1.87 | 4.17   | C65  | 3.73  | 12.15 | 1.96 | 3.96   |
| C26  | 0.02  | 5.74 | 1.88 | 3.96   | C66  | 4.96  | 11.44 | 1.98 | 4.16   |
| C27  | 1.25  | 5.02 | 1.95 | 4.13   | C67  | 6.19  | 12.15 | 1.98 | 3.90   |
| C28  | 2.48  | 5.74 | 1.99 | 3.99   | C68  | 7.43  | 11.44 | 1.96 | 4.08   |
| C29  | 3.70  | 5.05 | 2.17 | 3.45   | C69  | 5.02  | 4.09  | 5.06 | 3.52   |
| C30  | 8.68  | 5.06 | 2.04 | 3.50   | N1   | 6.19  | 3.47  | 2.53 | 6.20   |
| C31  | 9.91  | 5.74 | 1.87 | 4.03   | N2   | 4.83  | 5.80  | 2.37 | 6.28   |
| C32  | 11.14 | 5.02 | 1.87 | 3.96   | N3   | 7.54  | 5.79  | 2.18 | 6.24   |
| C33  | -3.67 | 7.88 | 1.80 | 4.07   | Nb   | 6.21  | 5.21  | 3.79 | 11.33  |
| C34  | -2.44 | 7.16 | 1.81 | 3.91   | Cu1  | 5.16  | 6.00  | 5.89 | 10.96  |
| C35  | -1.21 | 7.88 | 1.82 | 4.16   | Cu2  | 4.12  | 8.14  | 5.55 | 11.02  |
| C36  | 0.02  | 7.16 | 1.85 | 3.96   | Cu3  | 6.21  | 8.00  | 4.39 | 10.85  |
| C37  | 1.25  | 7.88 | 1.89 | 4.17   | Cu4  | 7.65  | 6.48  | 5.60 | 11.20  |
| C38  | 2.48  | 7.17 | 1.96 | 3.73   | Cu5  | 6.14  | 7.97  | 6.81 | 11.02  |
| C39  | 3.71  | 7.88 | 2.00 | 4.01   | O    | 4.39  | 3.19  | 5.53 | 7.09   |
| C40  | 4.91  | 7.15 | 2.16 | 3.60   |      |       |       |      |        |



**Table S2. Bader charge data of Cu/NbN<sub>4</sub>-pd.**

| Atom | X     | Y    | Z    | CHARGE | Atom | X     | Y     | Z    | CHARGE |
|------|-------|------|------|--------|------|-------|-------|------|--------|
| C1   | 0.04  | 1.56 | 2.00 | 3.99   | C40  | 7.35  | 7.19  | 1.99 | 4.12   |
| C2   | 1.27  | 0.84 | 2.00 | 3.95   | C41  | 8.60  | 7.91  | 1.97 | 3.84   |
| C3   | 2.52  | 1.55 | 2.03 | 4.06   | C42  | 9.85  | 7.22  | 1.97 | 3.89   |
| C4   | 3.73  | 0.80 | 2.02 | 4.14   | C43  | -4.94 | 10.07 | 1.95 | 3.74   |
| C5   | 4.97  | 1.51 | 2.02 | 3.98   | C44  | -3.71 | 9.36  | 1.94 | 4.16   |
| C6   | 6.20  | 0.80 | 1.98 | 3.99   | C45  | -2.47 | 10.07 | 1.93 | 3.97   |
| C7   | 7.43  | 1.51 | 1.98 | 3.95   | C46  | -1.23 | 9.37  | 1.90 | 4.17   |
| C8   | 8.67  | 0.81 | 1.96 | 3.98   | C47  | 0.00  | 10.09 | 1.90 | 3.79   |
| C9   | 9.90  | 1.53 | 1.98 | 3.97   | C48  | 1.23  | 9.39  | 1.89 | 3.99   |
| C10  | 11.14 | 0.83 | 1.97 | 3.73   | C49  | 2.47  | 10.10 | 1.94 | 4.19   |
| C11  | 12.38 | 1.54 | 1.98 | 3.89   | C50  | 3.71  | 9.41  | 1.95 | 4.01   |
| C12  | 13.61 | 0.84 | 1.98 | 4.08   | C51  | 4.94  | 10.10 | 1.92 | 3.98   |
| C13  | -1.19 | 3.68 | 1.97 | 3.93   | C52  | 6.17  | 9.37  | 1.92 | 3.99   |
| C14  | 0.07  | 2.99 | 2.00 | 3.96   | C53  | 7.41  | 10.08 | 1.94 | 3.96   |
| C15  | 1.32  | 3.71 | 2.03 | 3.95   | C54  | 8.63  | 9.35  | 1.95 | 4.15   |
| C16  | 2.57  | 2.98 | 2.10 | 3.62   | C55  | -6.15 | 12.23 | 1.97 | 3.96   |
| C17  | 4.97  | 2.92 | 2.11 | 3.44   | C56  | -4.93 | 11.50 | 1.97 | 3.94   |
| C18  | 6.21  | 3.63 | 2.10 | 3.69   | C57  | -3.69 | 12.21 | 1.98 | 3.94   |
| C19  | 7.43  | 2.93 | 2.02 | 3.97   | C58  | -2.46 | 11.50 | 1.95 | 3.96   |
| C20  | 8.66  | 3.65 | 2.02 | 3.86   | C59  | -1.22 | 12.21 | 1.95 | 4.18   |
| C21  | 9.90  | 2.95 | 2.00 | 4.17   | C60  | 0.01  | 11.51 | 1.93 | 3.91   |
| C22  | 11.13 | 3.67 | 1.98 | 3.96   | C61  | 1.25  | 12.22 | 1.94 | 4.25   |
| C23  | 12.38 | 2.97 | 1.98 | 4.15   | C62  | 2.48  | 11.52 | 1.94 | 3.93   |
| C24  | -2.46 | 5.81 | 1.93 | 4.31   | C63  | 3.72  | 12.23 | 1.95 | 3.95   |
| C25  | -1.21 | 5.10 | 1.93 | 4.09   | C64  | 4.96  | 11.52 | 1.94 | 4.18   |
| C26  | 0.02  | 5.82 | 1.89 | 3.75   | C65  | 6.20  | 12.24 | 1.95 | 3.86   |
| C27  | 1.28  | 5.14 | 1.94 | 3.64   | C66  | 7.42  | 11.51 | 1.96 | 4.15   |
| C28  | 7.36  | 5.75 | 2.07 | 3.45   | C67  | 4.98  | 4.54  | 4.65 | 3.43   |
| C29  | 8.62  | 5.07 | 2.02 | 3.95   | N1   | 3.79  | 3.63  | 2.23 | 6.21   |
| C30  | 9.86  | 5.80 | 1.98 | 4.21   | N2   | 2.45  | 5.88  | 1.94 | 6.34   |
| C31  | 11.11 | 5.09 | 1.96 | 3.88   | N3   | 6.19  | 5.01  | 2.21 | 6.27   |
| C32  | -3.72 | 7.93 | 1.94 | 3.95   | N4   | 4.92  | 7.27  | 1.84 | 6.21   |
| C33  | -2.47 | 7.23 | 1.92 | 3.73   | Nb   | 4.26  | 5.63  | 2.95 | 11.09  |
| C34  | -1.24 | 7.95 | 1.89 | 3.94   | Cu1  | 4.36  | 6.25  | 5.42 | 10.97  |
| C35  | 0.00  | 7.25 | 1.86 | 4.08   | Cu2  | 2.02  | 6.67  | 5.37 | 11.03  |
| C36  | 1.22  | 7.97 | 1.85 | 4.03   | Cu3  | 3.48  | 8.13  | 4.14 | 10.86  |
| C37  | 2.44  | 7.25 | 1.88 | 3.59   | Cu4  | 5.57  | 8.28  | 5.36 | 11.00  |
| C38  | 3.71  | 7.97 | 1.96 | 3.74   | Cu5  | 3.49  | 8.19  | 6.57 | 11.05  |
| C39  | 6.13  | 7.94 | 1.91 | 3.58   | O    | 5.49  | 3.63  | 5.23 | 7.05   |
